# Supplementary material
Source: PubMed Central journal article supplement (PMC3965305)

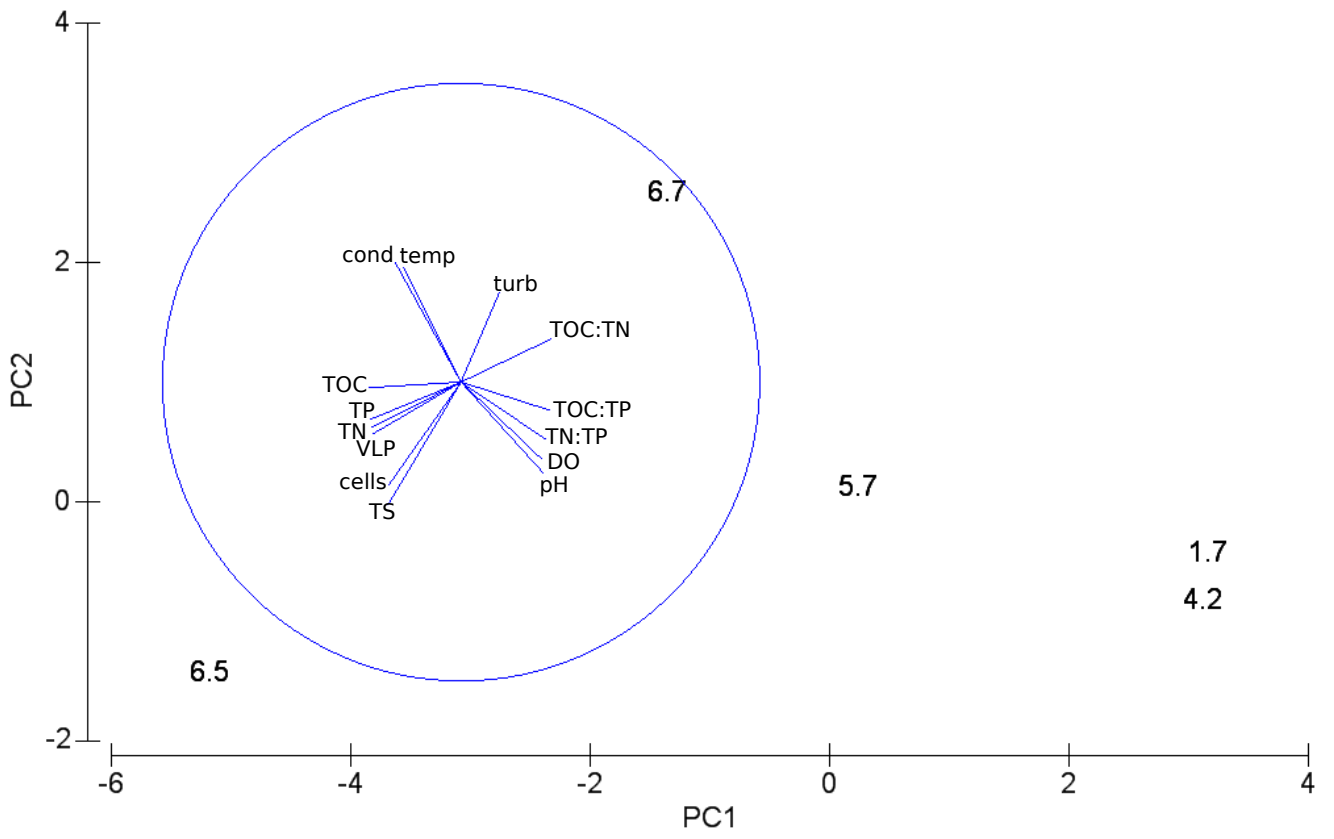

Supplement: ismej201369x10.pdf [file ismej201369x10.pdf]

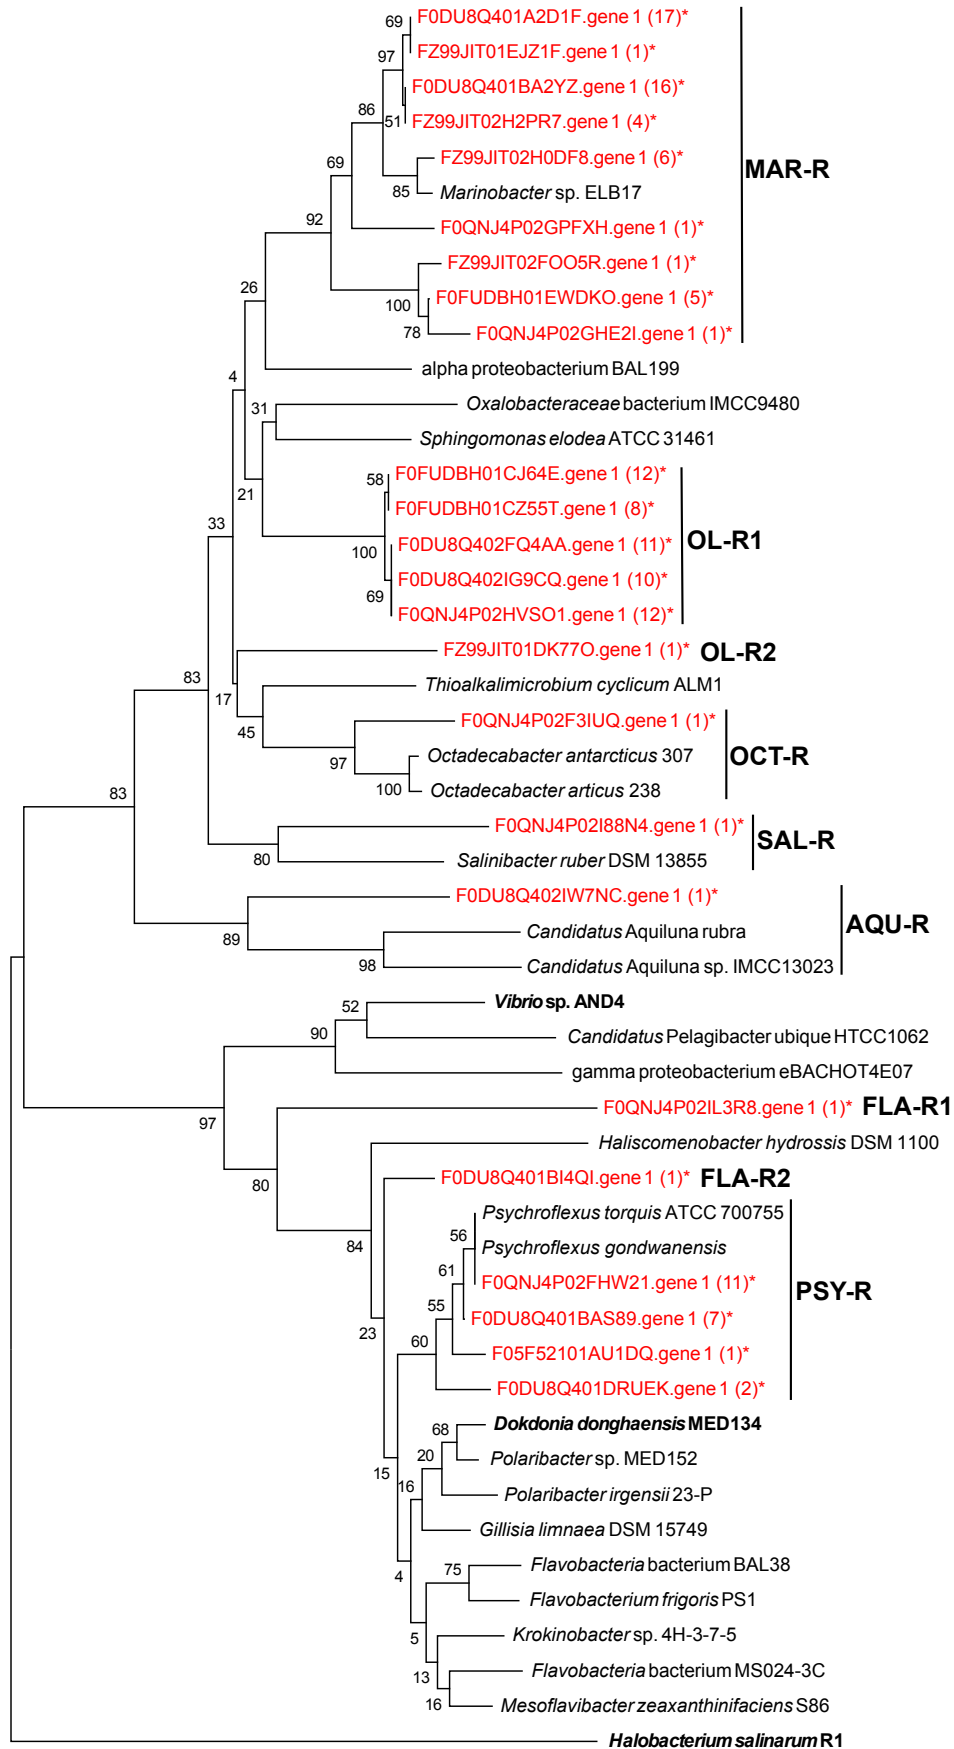

0.1

Supplement: ismej201369x11.pdf [file ismej201369x11.pdf]

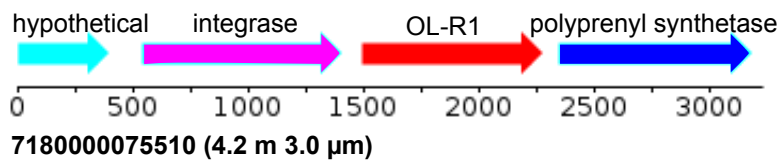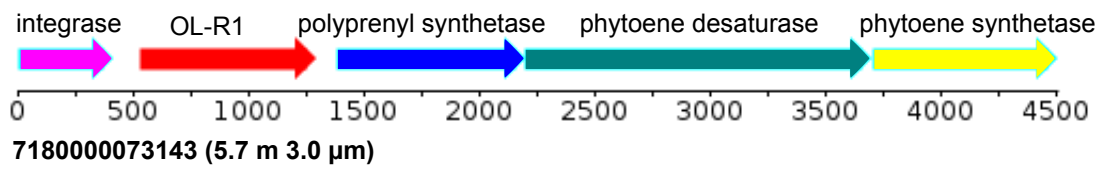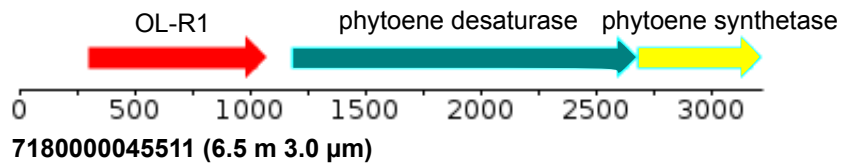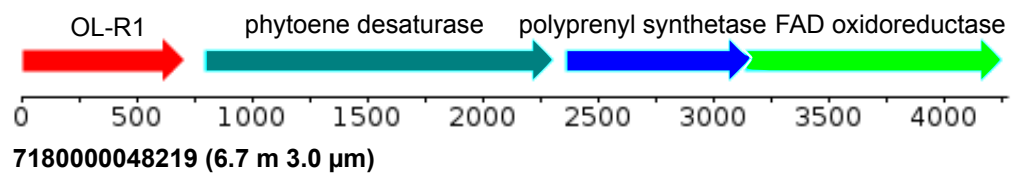

Supplement: ismej201369x12.pdf [file ismej201369x12.pdf]

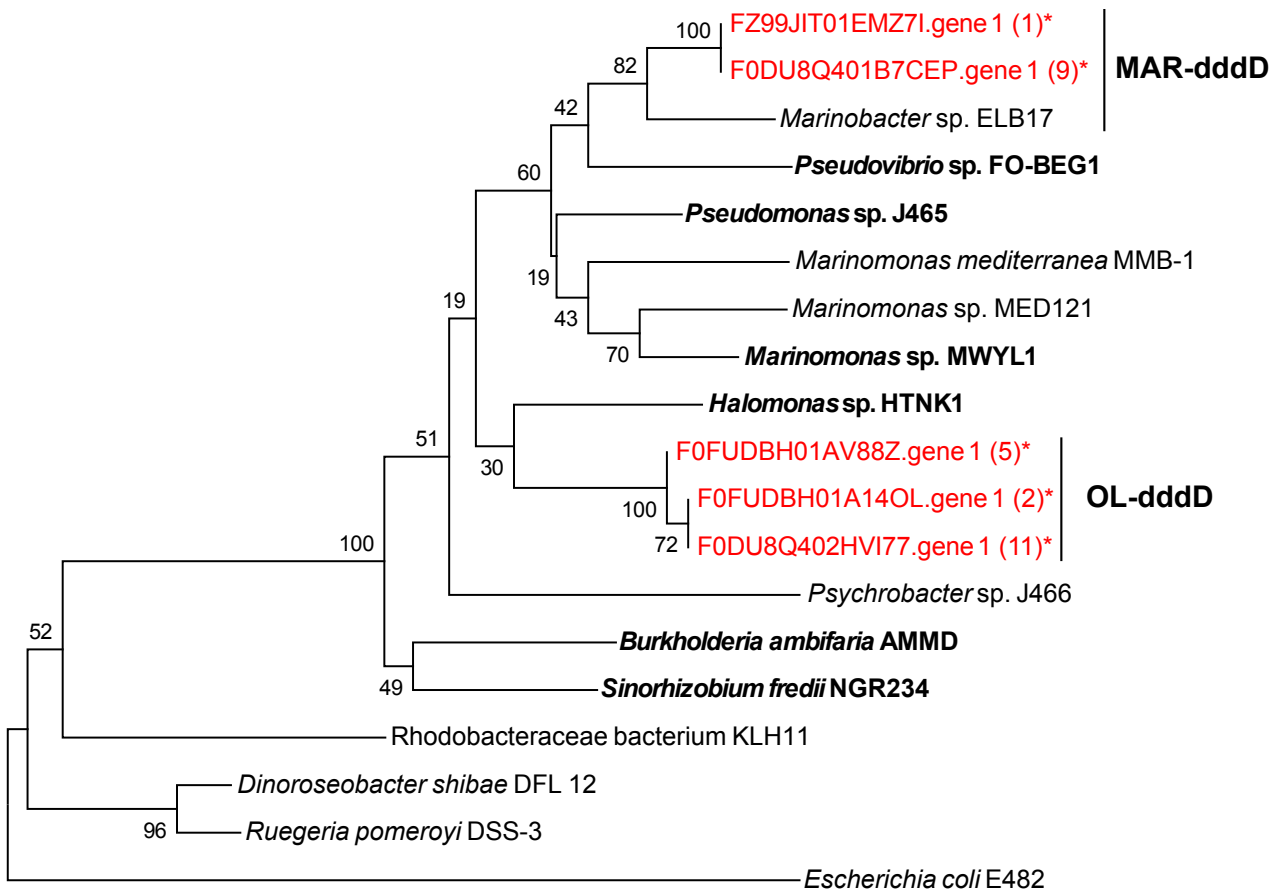

Supplement: ismej201369x13.pdf [file ismej201369x13.pdf]

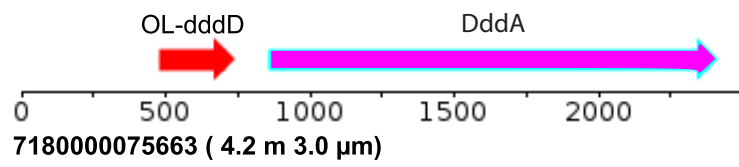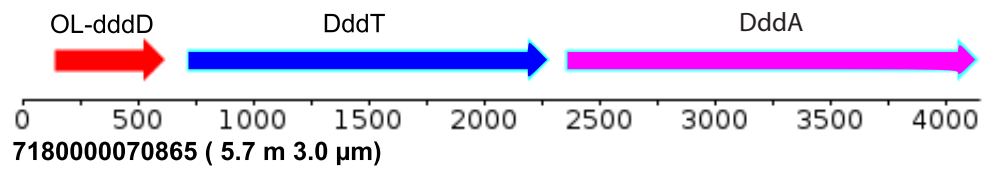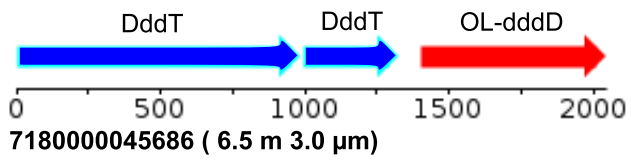

Supplement: ismej201369x14.pdf [file ismej201369x14.pdf]

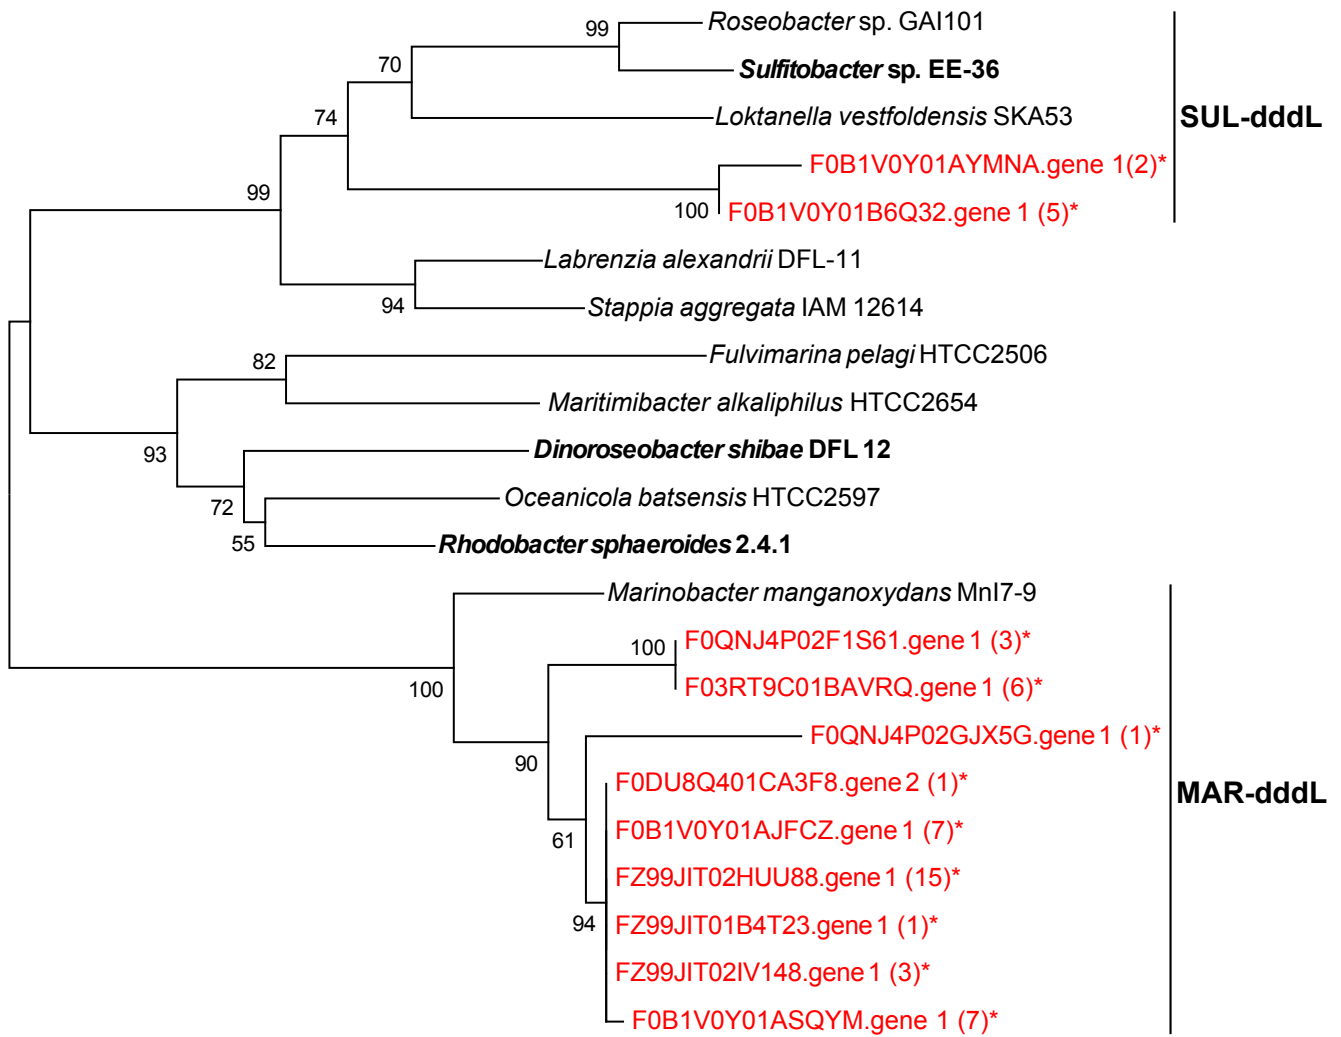

0.1

Supplement: ismej201369x15.pdf [file ismej201369x15.pdf]

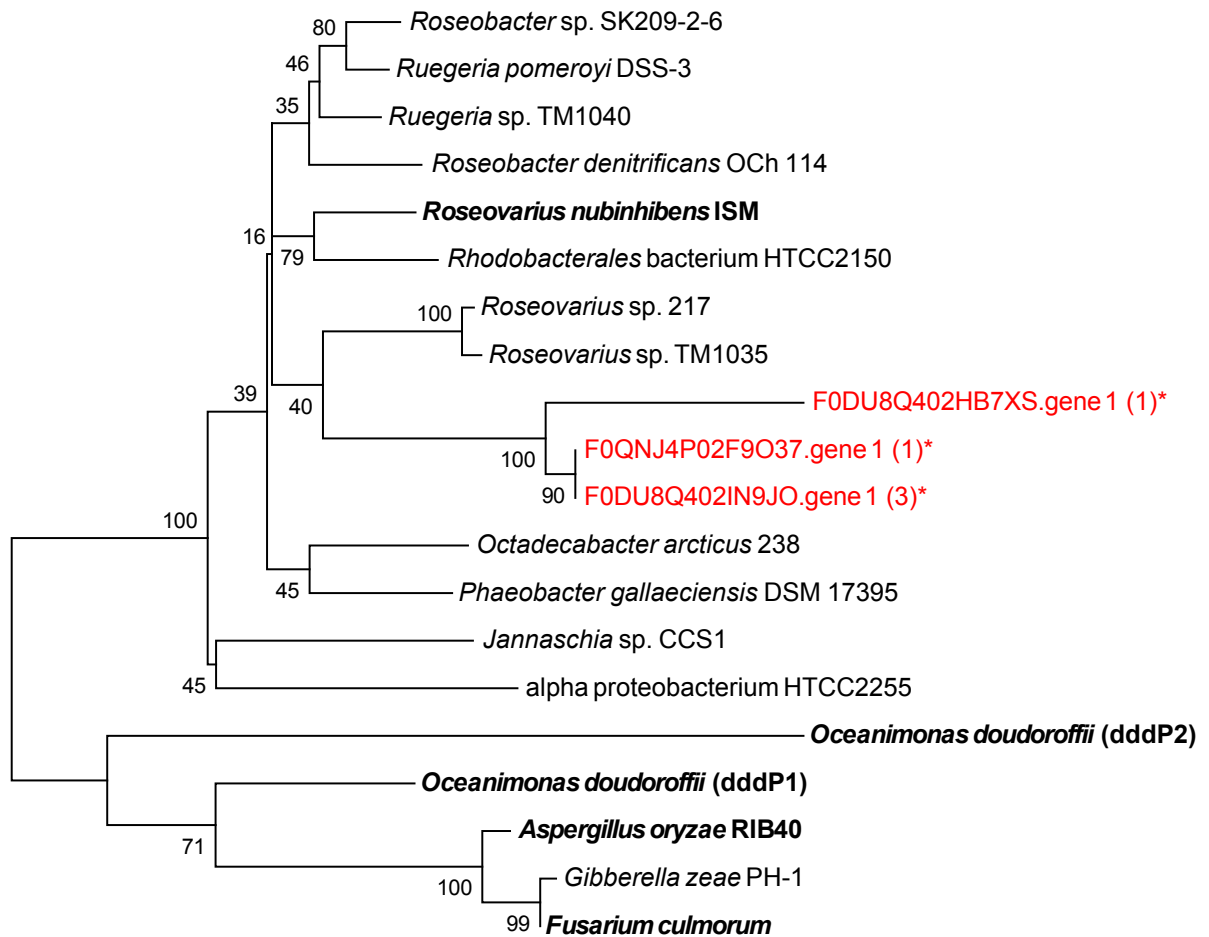

0.05

Supplement: ismej201369x16.pdf [file ismej201369x16.pdf]

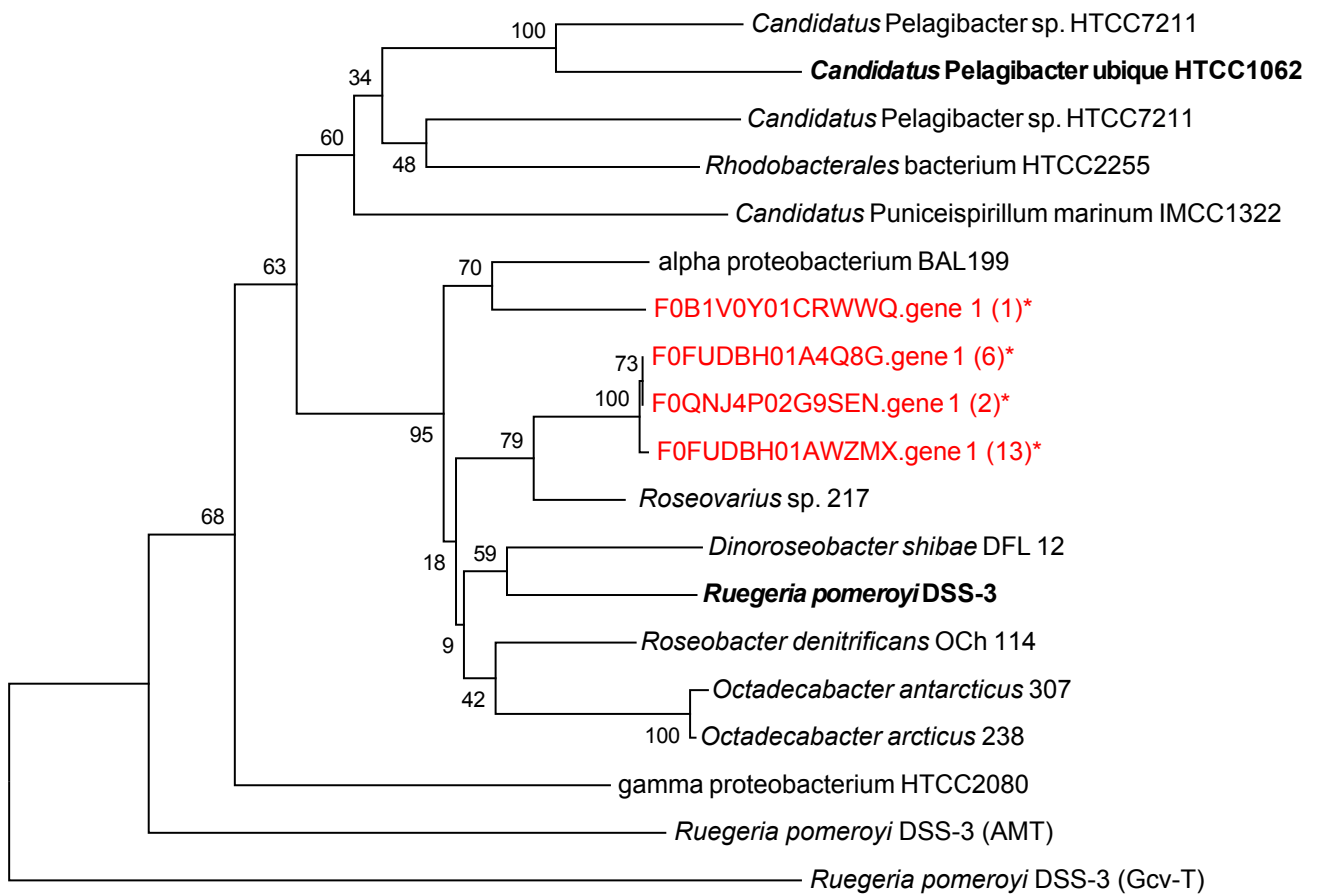

0.1

Supplement: ismej201369x17.pdf [file ismej201369x17.pdf]

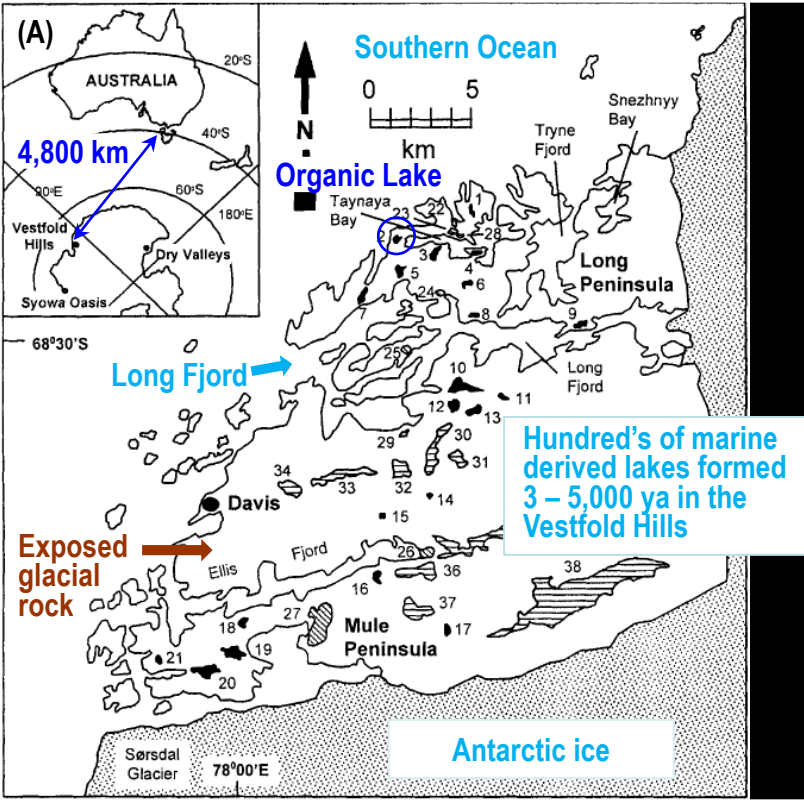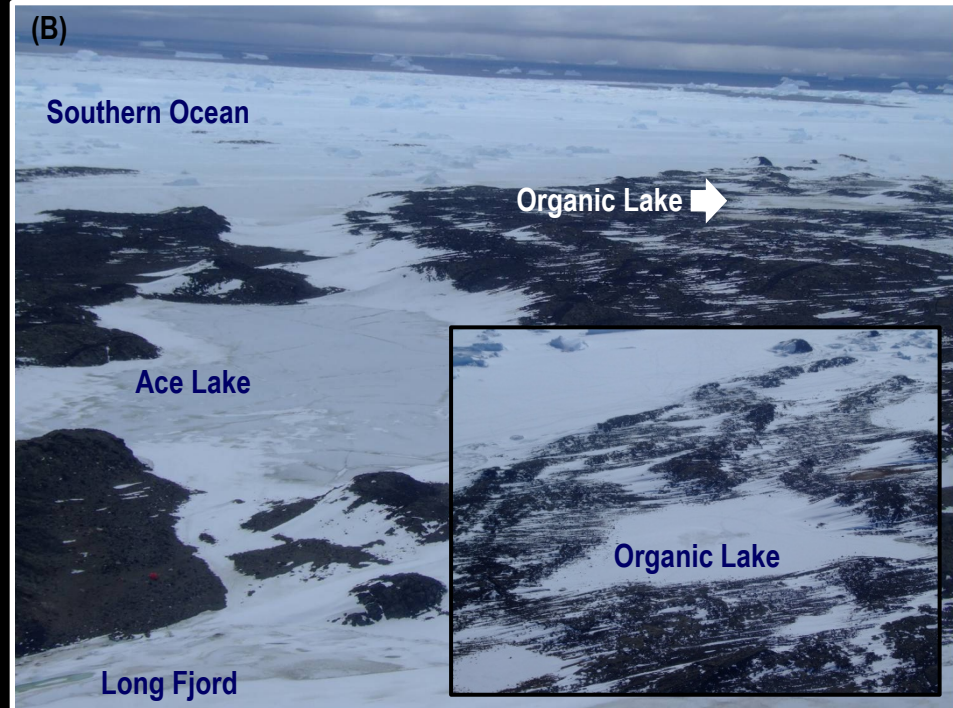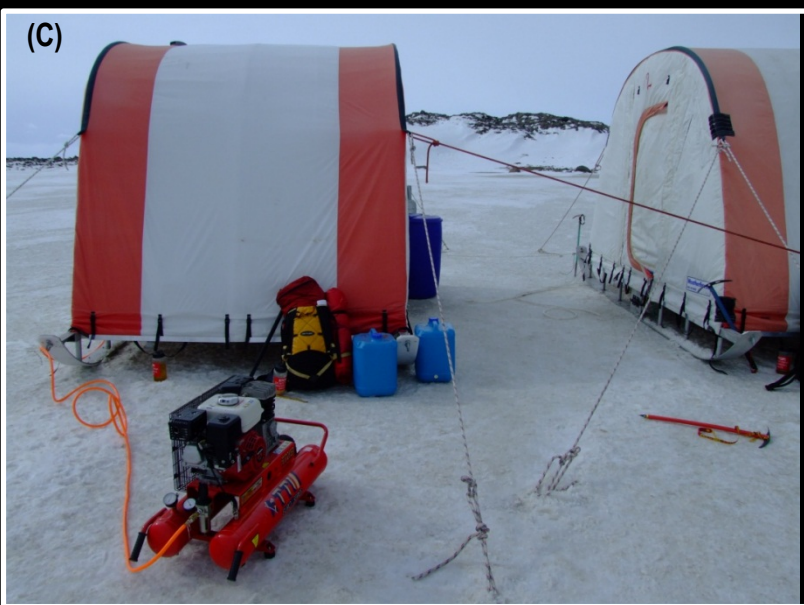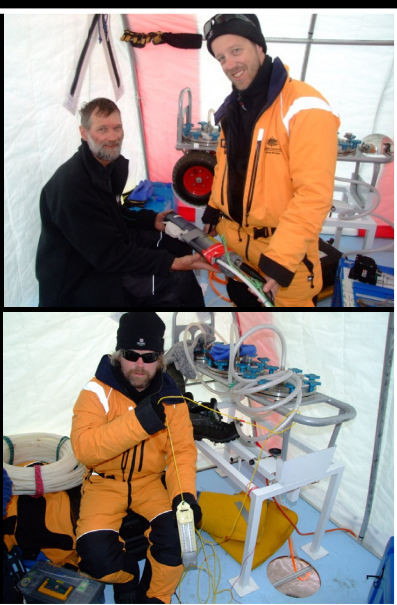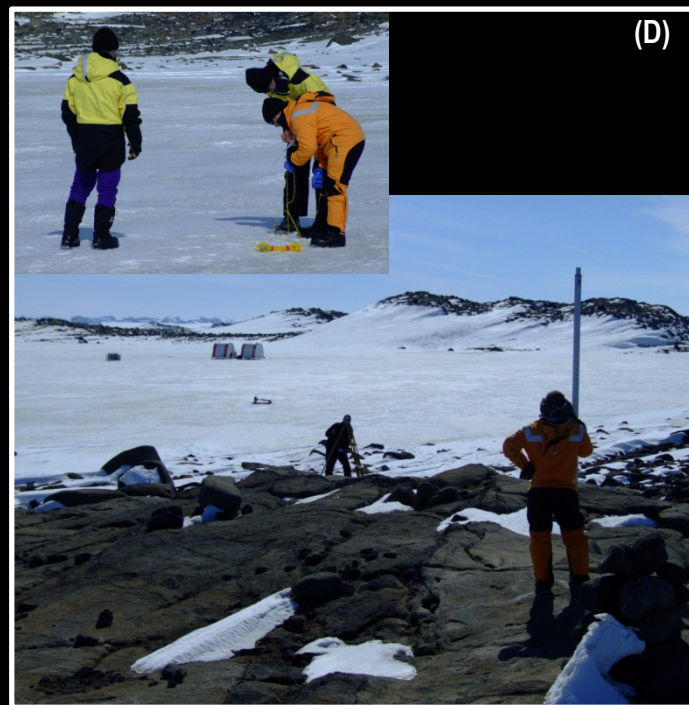

Supplement: ismej201369x6.pdf [file ismej201369x6.pdf]

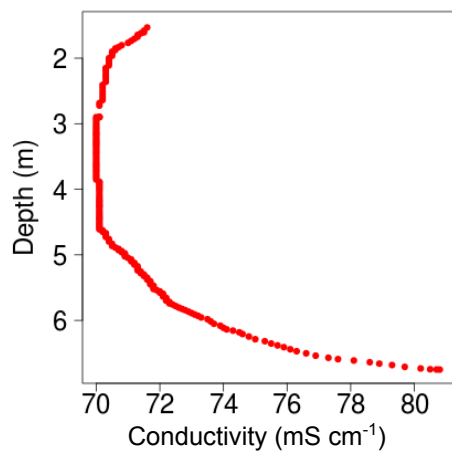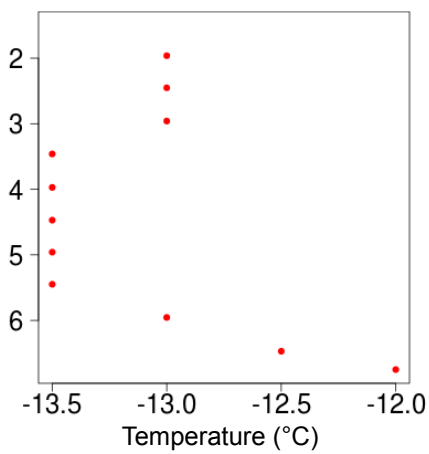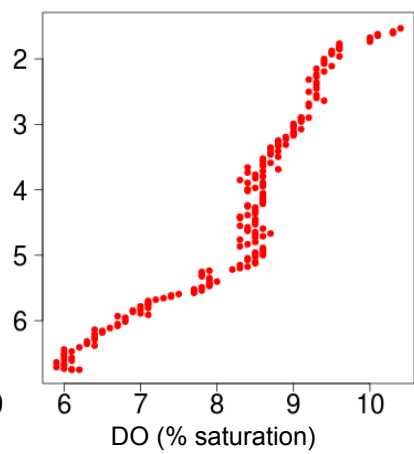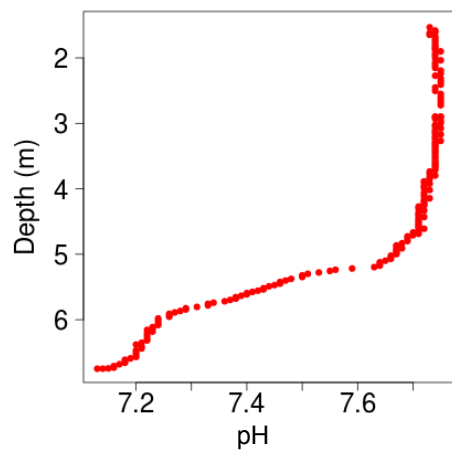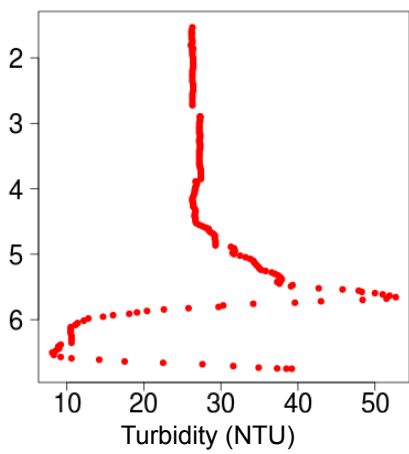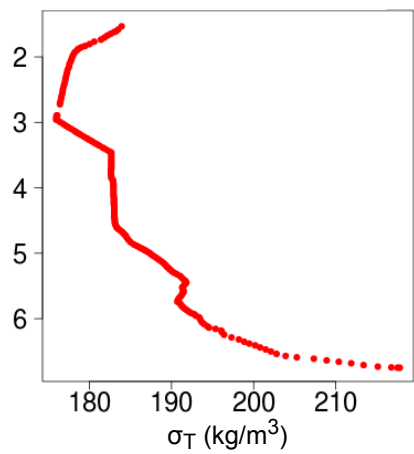

Supplement: ismej201369x7.pdf [file ismej201369x7.pdf]

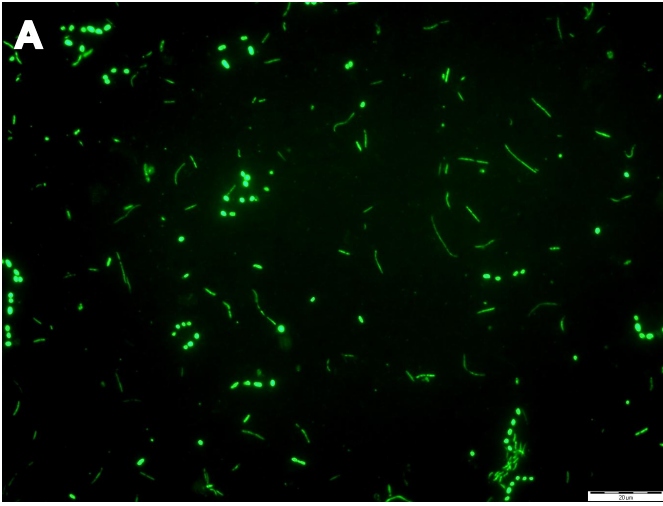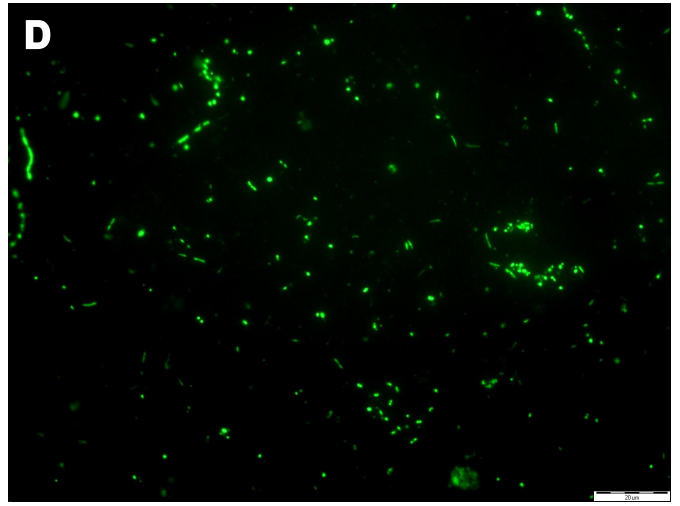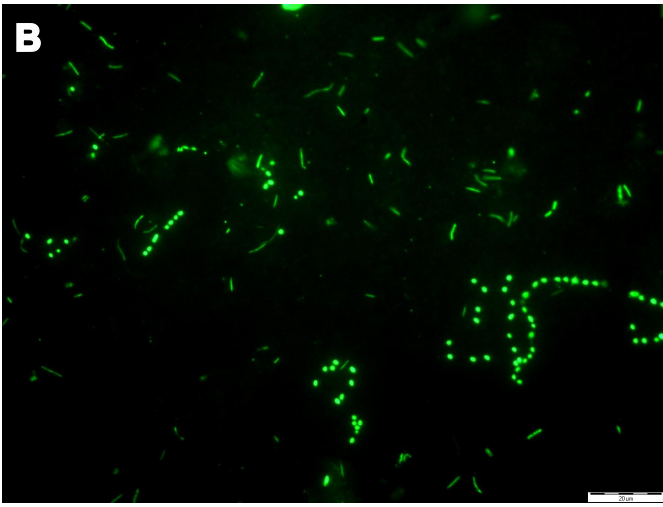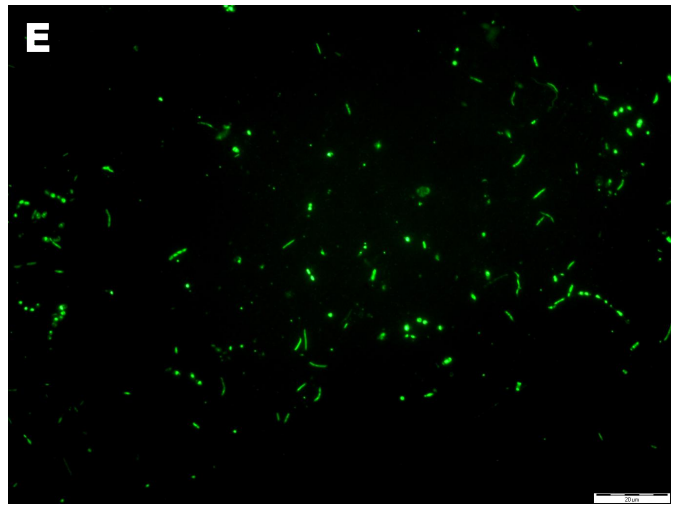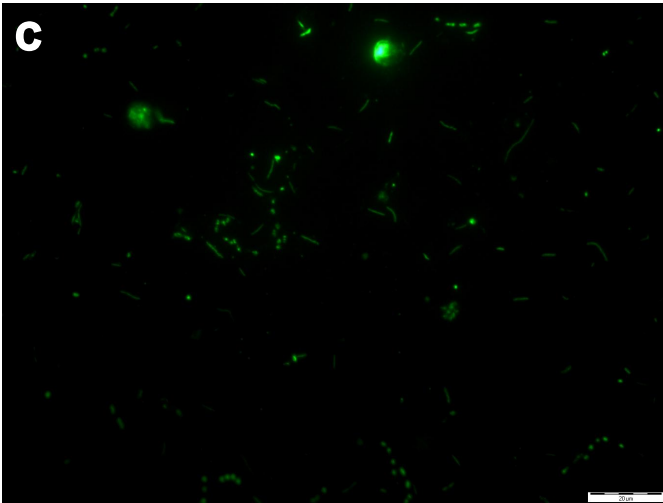

Supplement: ismej201369x9.pdf [file ismej201369x9.pdf]
